# Supplementary material
Source: publisher site journal article supplement (https://www.spandidos-publications.com/5042/downloadSupplementary)
Supplement: Supplementary file 1 [file downloadSupplementary]

Figure S1. Progression-free survival of patients who received second-line chemotherapy vs. BSC. BSC, best supportive care.

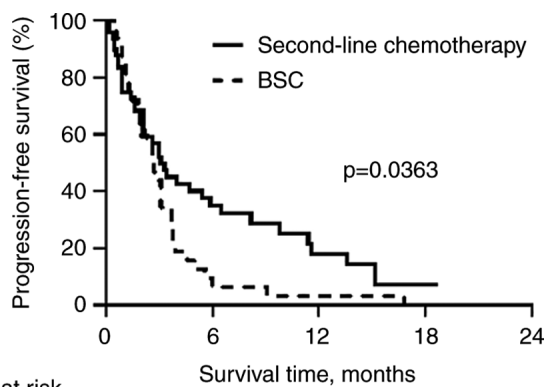

| Number at risk           |    | Survival time, months |    |    |    |
|--------------------------|----|-----------------------|----|----|----|
|                          | 0  | 6                     | 12 | 18 | 24 |
| Second-line chemotherapy | 51 | 13                    | 5  | 1  | 0  |
| BSC                      | 32 | 3                     | 1  | 0  | 0  |

Figure S2. Overall survival of patients who received second-line chemotherapy vs. BSC in patients who were (A) refractory to first-line GCS therapy and (B) intolerant to first-line GCS therapy. BSC, best supportive care; GCS, gemcitabine, cisplatin and S-1.

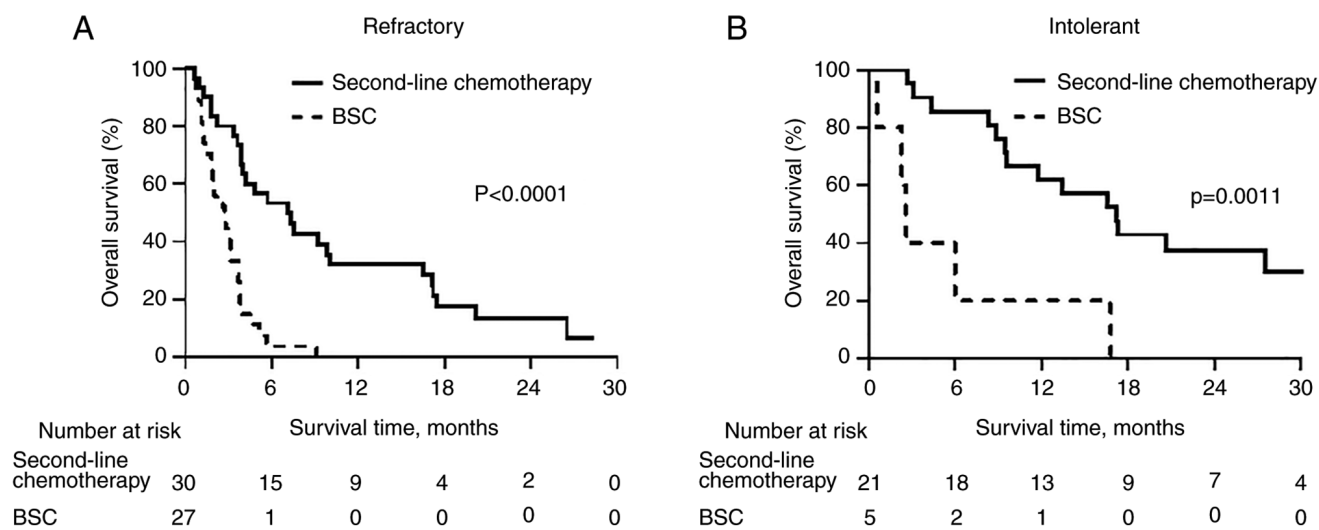

Figure S3. Overall survival of patients who received single agent vs. doublet chemotherapy.

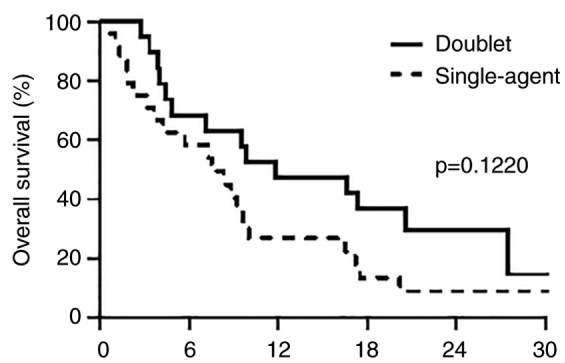

|                | Survival time, months |    |    |    |    |    |
|----------------|-----------------------|----|----|----|----|----|
| Number at risk | 0                     | 6  | 12 | 18 | 24 | 30 |
| Doublet        | 19                    | 13 | 9  | 6  | 4  | 1  |
| Single-agent   | 24                    | 13 | 6  | 3  | 1  | 1  |
